# Supplementary material for: Memory for incidentally learned categories evolves in the post-learning interval
Source: eLife. 2023 Mar 24;12:e81855. doi: 10.7554/eLife.81855 (PMC10101687; doi:10.7554/eLife.81855)
Supplement: Supplementary file 1. — Supplemental Table 1 - RT Facilitation as a function of Experiment, ANOVA. Supplemental Table 2 - RT Cost as a function of Session and Experiment, ANOVA. Supplemental Table 3 - RT Facilitation across Day-1 to Day-2 as a function of Experiment, ANOVA. Supplemental Table 4 - Retention RT as a function of Experiment, ANOVA. Supplemental Table 5 - Posttest generalization accuracy as a function Category Type and Experiment, ANOVA. [file elife-81855-supp1.xlsx]

## Sheet: SM_tables
Comparison of Experiment 2 versus Experiment 3 Outcomes
Supplemental Table 1
RT Facilitation as a function of Experiment, ANOVA
	df	F	p	Partial eta-squared
Experiment (Exp 2, Exp 3)	1, 44	3.61	0.06	0.07
Block (1-6)	5, 220	2.19	0.05	0.04
Experiment * Block	5, 220	1.38	0.23	0.03
Supplemental Table 2
RT Cost as a function of Session and Experiment, ANOVA
	df	F	p	Partial eta-squared
Experiment (Exp 2, Exp 3)	1, 44	3.71	0.06	0.07
Session (Day-1, Day-2, Day-10)	2, 88	13.32	0.001	0.23
Experiment * Session	2, 88	0.24	0.78	0.01
RT Cost	1, 44	12.5	0.001	0.22
RT Cost * Experiment	2, 88	0.99	0.32	0.02
Session * RT Cost	2, 88	0.63	0.53	0.01
Session * RT Cost * Experiment	2, 88	3.43	0.03	0.07
Supplemental Table 3
RT Facilitation across Day-1 to Day-2 as a function of Experiment, ANOVA
	df	F	p	Partial eta-squared
Experiment (Exp 2, Exp 3)	1, 44	1.68	0.2	0.03
RT Facilitation (Day-1 last block, Day-2 first block)	1, 44	9.97	0.002	0.18
Experiment * RT Facilitation	1, 44	1.28	0.26	0.02
Supplemental Table 4
Retention RT as a function of Experiment, ANOVA
	df	F	p	Partial eta-squared
Experiment (Exp 2, Exp 3)	1, 44	3.99	0.05	0.08
Retention RT (Day-2 last block, Day-10 first block)	1, 44	0.81	0.37	0.01
Experiment * Retention RT	1, 44	0.14	0.37	0.003
Supplemental Table 5
Posttest generalization accuracy as a function Category Type and Experiment, ANOVA
	df	F	p	Partial eta-squared
Experiment (Exp 2, Exp 3)	1, 44	0.29	0.58	0.006
Category Type (Uni-, Multi-dim)	1, 44	9.63	0.003	0.17
Experiment * Category Type	1, 44	5.45	0.02	0.11
